# Supplementary material for: Evolution of Conifer Diterpene Synthases: Diterpene Resin Acid Biosynthesis in Lodgepole Pine and Jack Pine Involves Monofunctional and Bifunctional Diterpene Synthases
Source: Oxford University Press journal article supplement (doi:10.1104/pp.112.208546), 2012-12-12
Supplement: plphys_v161_2_600_s1.zip [file plphys_v161_2_600_s1.zip]

**Table S1. Amino acid sequence identity matrix of *Pinus banksiana* (Pb) and *Pinus contorta* (Pc) diterpene synthase candidate genes with previously characterized diTPS from *Pinus taeda* (PtLAS), *Picea abies* (PaLAS, PaISO), and *Picea glauca* ECPS and EKS.** Abbreviations: LAS, levopimaradiene/abietadiene synthase; ISO, isopimaradiene synthase; PIM, pimaradiene synthase; ECPS, *ent*-copalyl diphosphate synthase; EKS, *ent*-kaurene synthase.

[illegible]
