# Supplementary material for: Evolution of Conifer Diterpene Synthases: Diterpene Resin Acid Biosynthesis in Lodgepole Pine and Jack Pine Involves Monofunctional and Bifunctional Diterpene Synthases
Source: Oxford University Press journal article supplement (doi:10.1104/pp.112.208546), 2012-12-12
Supplement: plphys_v161_2_600_s1.zip [file plphys_v161_2_600_s1.zip]

Archive with 10 entries (10 files):
- 208546Figure_S1.pdf
- 208546Figure_S2.pdf
- 208546Figure_S3.pdf
- 208546Figure_S4.pdf
- 208546Figure_S5.pdf
- 208546Figure_S6.pdf
- 208546Figure_S7.pdf
- 208546Table_S1_formatted.pdf
- 208546Table_S2_formatted.pdf
- 208546Table_S3_formatted.pdf
