# Supplementary material for: Evolution of Conifer Diterpene Synthases: Diterpene Resin Acid Biosynthesis in Lodgepole Pine and Jack Pine Involves Monofunctional and Bifunctional Diterpene Synthases
Source: Oxford University Press journal article supplement (doi:10.1104/pp.112.208546), 2012-12-12
Supplement: plphys_v161_2_600_s1.zip [file plphys_v161_2_600_s1.zip]

**Figure S7**

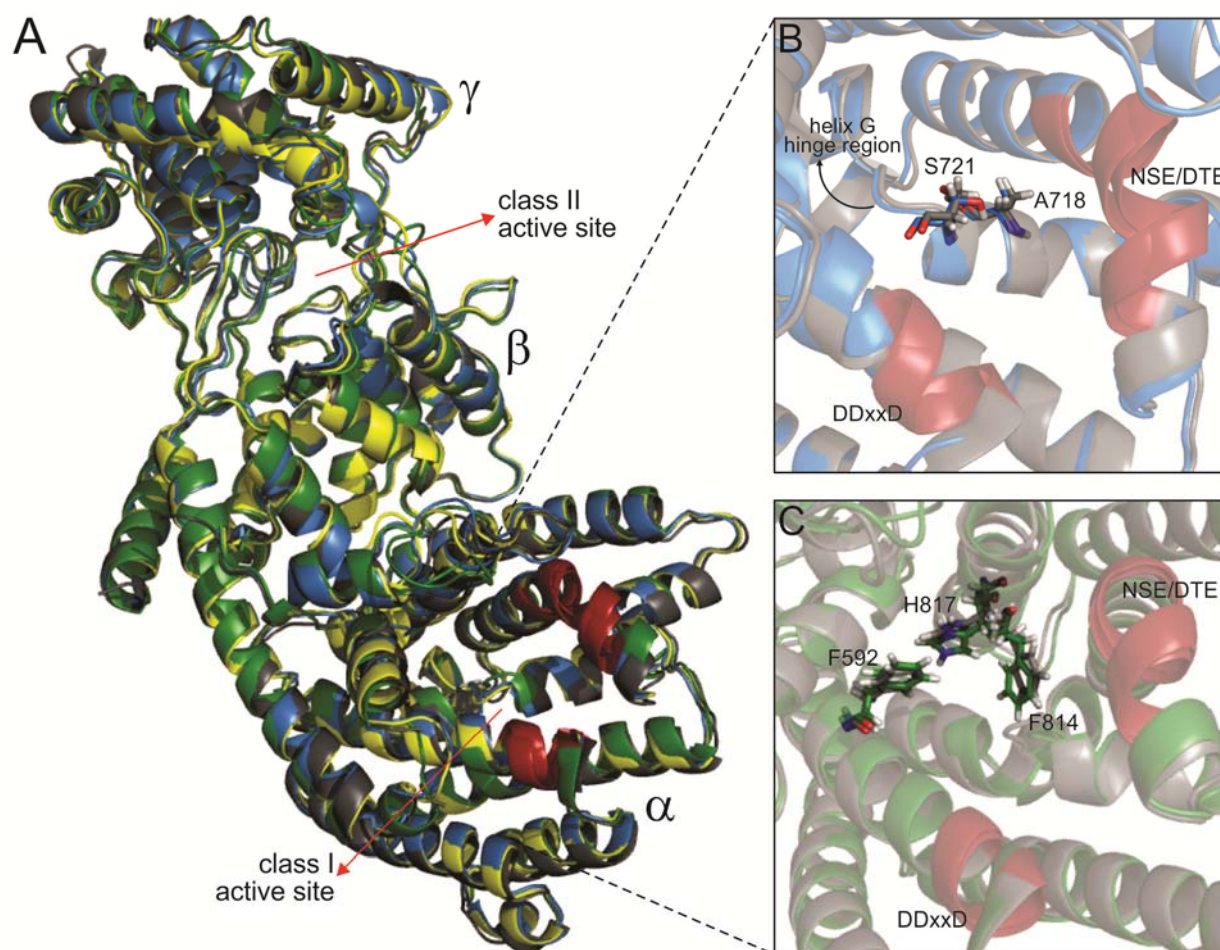

**Figure S7. Homology modeling of pine monofunctional diterpene synthases.** The structural models of *PbmPIM1*, *PbmISO1* and *PbmDI TPS1* with the template *Taxus brevifolia* taxadiene synthase (Köksal et al., 2010; PDB-ID 3P5R, chain A) are shown as representatives for all of the modeled monofunctional diTPS from lodgepole pine and jack pine. [A] Superimposed homology models of *PbmPIM1* (blue), *PbmISO1* (yellow) and *PbmDI TPS1* (green), possess the characteristic  $\alpha$ -helical tri-domain structure. Each model is comprised of the N-terminal  $\beta\gamma$ -domain, which harbors the class I active site and C-terminal  $\alpha$ -domain that contains the class I active site. [B] Class I active site cavity of *PbmPIM1* (blue) and *PcmPIM1* (grey), illustrating Ala718 and Ser721 as putative catalytic residues that impact product specificity. [C] Class I active site cavity of *PbmDI TPS1* (green) and *PcmDI TPS1* (grey), highlighting Phe592, Phe814 and His817 as possible residues that contribute to the enzyme's loss of function. The class I signature motifs DDxxD and NSE/DTE are depicted in red.
