# Supplementary material for: Evolution of Conifer Diterpene Synthases: Diterpene Resin Acid Biosynthesis in Lodgepole Pine and Jack Pine Involves Monofunctional and Bifunctional Diterpene Synthases
Source: Oxford University Press journal article supplement (doi:10.1104/pp.112.208546), 2012-12-12
Supplement: plphys_v161_2_600_s1.zip [file plphys_v161_2_600_s1.zip › 208546Figure_S1.pdf]

## Figure S1

Figure S1

|  |  |  |  |    |  |  |  |  |  |  |  |  |  |  |  |  |  |  |  |  |  |  |  |  |  |  |  |  |  |  |  |  |  |  |  |  |  |  |  |  |  |  |  |  |  |  |  |  |  |  |  |  |  |  |  |  |  |  |  |  |  |  |  |  |  |  |  |  |  |  |  |  |  |  |  |  |  |  |  |  |  |  |  |  |  |  |  |  |  |  |  |  |  |  |  |  |  |  |  |  |  |  |  |  |  |  |  |  |  |  |  |  |  |  |  |  |  |  |  |  |  |  |  |  |  |  |  |  |  |  |  |  |  |  |  |  |  |  |  |  |  |  |  |  |  |  |  |  |  |  |  |  |  |  |  |  |  |  |  |  |  |  |  |  |  |  |  |  |  |  |  |  |  |  |  |  |  |  |  |  |  |  |  |  |  |  |  |  |  |  |  |  |  |  |  |  |  |  |  |  |  |  |  |  |  |  |  |  |  |  |  |  |  |  |  |  |  |  |  |  |  |  |  |  |  |  |  |  |  |  |  |  |  |  |  |  |  |  |  |  |  |  |  |  |  |  |  |  |  |  |  |  |  |  |  |  |  |  |  |  |  |  |  |  |  |  |  |  |  |  |  |  |  |  |  |  |  |  |  |  |  |  |  |  |  |  |  |  |  |  |  |  |  |  |  |  |  |  |  |  |  |  |  |  |  |  |  |  |  |  |  |  |  |  |  |  |  |  |  |  |  |  |  |  |  |  |  |  |  |  |  |  |  |  |  |  |  |  |  |  |  |  |  |  |  |  |  |  |  |  |  |  |  |  |  |  |  |  |  |  |  |  |  |  |  |  |  |  |  |  |  |  |  |  |  |  |  |  |  |  |  |  |  |  |  |  |  |  |  |  |  |  |  |  |  |  |  |  |  |  |  |  |  |  |  |  |  |  |  |  |  |  |  |  |  |  |  |  |  |  |  |  |  |  |  |  |  |  |  |  |  |  |  |  |  |  |  |  |  |  |  |  |  |  |  |  |  |  |  |  |  |  |  |  |  |  |  |  |  |  |  |  |  |  |  |  |  |  |  |  |  |  |  |  |  |  |  |  |  |  |  |  |  |  |  |  |  |  |  |  |  |  |  |  |  |  |  |  |  |  |  |  |  |  |  |  |  |  |  |  |  |  |  |  |  |  |  |  |  |  |  |  |  |  |  |  |  |  |  |  |  |  |  |  |  |  |  |  |  |  |  |  |  |  |  |  |  |  |  |  |  |  |  |  |  |  |  |  |  |  |  |  |  |  |  |  |  |  |  |  |  |  |  |  |  |  |  |  |  |  |  |  |  |  |  |  |  |  |  |  |  |  |  |  |  |  |  |  |  |  |  |  |  |  |  |  |  |  |  |  |  |  |  |  |  |  |  |  |  |  |  |  |  |  |  |  |  |  |  |  |  |  |  |  |  |  |  |  |  |  |  |  |  |  |  |  |  |  |  |  |  |  |  |  |  |  |  |  |  |  |  |  |  |  |  |  |  |  |  |  |  |  |  |  |  |  |  |  |  |  |  |  |  |  |  |  |  |  |  |  |  |  |  |  |  |  |  |  |  |  |  |  |  |  |  |  |  |  |  |  |  |  |  |  |  |  |  |  |  |  |  |  |  |  |  |  |  |  |  |  |  |  |  |  |  |  |  |  |  |  |  |  |  |  |  |  |  |  |  |  |  |  |  |  |  |  |  |  |  |  |  |  |  |  |  |  |  |  |  |  |  |  |  |  |  |  |  |  |  |  |  |  |  |  |  |  |  |  |  |  |  |  |  |  |  |  |  |  |  |  |  |  |  |  |  |  |  |  |  |  |  |  |  |  |  |  |  |  |  |  |  |  |  |  |  |  |  |  |  |  |  |  |  |  |  |  |  |  |  |  |  |  |  |  |  |  |  |  |  |  |  |  |  |  |  |  |  |  |  |  |  |  |  |  |  |  |  |  |  |  |  |  |  |  |  |  |  |  |  |  |  |  |  |  |  |  |  |  |  |  |  |  |  |  |  |  |  |  |  |  |  |  |  |  |  |  |  |  |  |  |  |  |  |  |  |  |  |  |  |  |  |  |  |  |  |  |  |  |  |  |  |  |  |  |  |  |  |  |  |  |  |  |  |  |  |  |  |  |  |  |  |  |  |  |  |  |  |  |  |  |  |  |  |  |  |  |  |  |  |  |  |  |  |  |  |  |  |  |  |  |  |  |  |  |  |  |  |  |  |  |  |  |  |  |  |  |  |  |  |  |  |  |  |  |  |  |  |  |  |  |  |  |  |  |  |  |  |  |  |  |  |  |  |  |  |  |  |  |  |  |  |  |  |  |  |  |  |  |  |  |  |  |  |  |  |  |  |  |  |  |  |  |  |  |  |  |  |  |  |  |  |  |  |  |  |  |  |  |  |  |  |  |  |  |  |  |  |  |  |  |  |  |  |  |  |  |  |  |  |  |  |  |  |  |  |  |  |  |  |  |  |  |  |  |  |  |  |  |  |  |  |  |  |  |  |  |  |  |  |  |  |  |  |  |  |  |  |  |  |  |  |  |  |  |  |  |  |  |  |  |  |  |  |  |  |  |  |  |  |  |  |  |  |  |  |  |  |  |  |  |  |  |  |  |  |  |  |  |  |  |  |  |  |  |  |  |  |  |  |  |  |  |  |  |  |  |  |  |  |  |  |  |  |  |  |  |  |  |  |  |  |  |  |  |  |  |  |  |  |  |  |  |  |  |  |  |  |  |  |  |  |  |  |  |  |  |  |  |  |  |  |  |  |  |  |  |  |  |  |  |  |  |  |  |  |  |  |  |  |  |  |  |  |  |  |  |  |  |  |  |  |  |  |  |  |  |  |  |  |  |  |  |  |  |  |  |  |  |  |  |  |  |  |  |  |  |  |  |  |  |  |  |  |  |  |  |  |  |  |  |  |  |  |  |  |  |  |  |  |  |  |  |  |  |  |  |  |  |  |  |  |  |  |  |  |  |  |  |  |  |  |  |  |  |  |  |  |  |  |  |  |  |  |  |  |  |  |  |  |  |  |  |  |  |  |  |  |  |  |  |  |  |  |  |  |  |  |  |  |  |  |  |  |  |  |  |  |  |  |  |  |  |  |  |  |  |  |  |  |  |  |  |  |  |  |  |  |  |  |  |  |  |  |  |  |  |  |  |  |  |  |  |  |  |  |  |  |  |  |  |  |  |  |  |  |  |  |  |  |  |  |  |  |  |  |  |  |  |  |  |  |  |  |  |  |  |  |  |  |  |  |  |  |  |  |  |  |  |
|--|--|--|--|----|--|--|--|--|--|--|--|--|--|--|--|--|--|--|--|--|--|--|--|--|--|--|--|--|--|--|--|--|--|--|--|--|--|--|--|--|--|--|--|--|--|--|--|--|--|--|--|--|--|--|--|--|--|--|--|--|--|--|--|--|--|--|--|--|--|--|--|--|--|--|--|--|--|--|--|--|--|--|--|--|--|--|--|--|--|--|--|--|--|--|--|--|--|--|--|--|--|--|--|--|--|--|--|--|--|--|--|--|--|--|--|--|--|--|--|--|--|--|--|--|--|--|--|--|--|--|--|--|--|--|--|--|--|--|--|--|--|--|--|--|--|--|--|--|--|--|--|--|--|--|--|--|--|--|--|--|--|--|--|--|--|--|--|--|--|--|--|--|--|--|--|--|--|--|--|--|--|--|--|--|--|--|--|--|--|--|--|--|--|--|--|--|--|--|--|--|--|--|--|--|--|--|--|--|--|--|--|--|--|--|--|--|--|--|--|--|--|--|--|--|--|--|--|--|--|--|--|--|--|--|--|--|--|--|--|--|--|--|--|--|--|--|--|--|--|--|--|--|--|--|--|--|--|--|--|--|--|--|--|--|--|--|--|--|--|--|--|--|--|--|--|--|--|--|--|--|--|--|--|--|--|--|--|--|--|--|--|--|--|--|--|--|--|--|--|--|--|--|--|--|--|--|--|--|--|--|--|--|--|--|--|--|--|--|--|--|--|--|--|--|--|--|--|--|--|--|--|--|--|--|--|--|--|--|--|--|--|--|--|--|--|--|--|--|--|--|--|--|--|--|--|--|--|--|--|--|--|--|--|--|--|--|--|--|--|--|--|--|--|--|--|--|--|--|--|--|--|--|--|--|--|--|--|--|--|--|--|--|--|--|--|--|--|--|--|--|--|--|--|--|--|--|--|--|--|--|--|--|--|--|--|--|--|--|--|--|--|--|--|--|--|--|--|--|--|--|--|--|--|--|--|--|--|--|--|--|--|--|--|--|--|--|--|--|--|--|--|--|--|--|--|--|--|--|--|--|--|--|--|--|--|--|--|--|--|--|--|--|--|--|--|--|--|--|--|--|--|--|--|--|--|--|--|--|--|--|--|--|--|--|--|--|--|--|--|--|--|--|--|--|--|--|--|--|--|--|--|--|--|--|--|--|--|--|--|--|--|--|--|--|--|--|--|--|--|--|--|--|--|--|--|--|--|--|--|--|--|--|--|--|--|--|--|--|--|--|--|--|--|--|--|--|--|--|--|--|--|--|--|--|--|--|--|--|--|--|--|--|--|--|--|--|--|--|--|--|--|--|--|--|--|--|--|--|--|--|--|--|--|--|--|--|--|--|--|--|--|--|--|--|--|--|--|--|--|--|--|--|--|--|--|--|--|--|--|--|--|--|--|--|--|--|--|--|--|--|--|--|--|--|--|--|--|--|--|--|--|--|--|--|--|--|--|--|--|--|--|--|--|--|--|--|--|--|--|--|--|--|--|--|--|--|--|--|--|--|--|--|--|--|--|--|--|--|--|--|--|--|--|--|--|--|--|--|--|--|--|--|--|--|--|--|--|--|--|--|--|--|--|--|--|--|--|--|--|--|--|--|--|--|--|--|--|--|--|--|--|--|--|--|--|--|--|--|--|--|--|--|--|--|--|--|--|--|--|--|--|--|--|--|--|--|--|--|--|--|--|--|--|--|--|--|--|--|--|--|--|--|--|--|--|--|--|--|--|--|--|--|--|--|--|--|--|--|--|--|--|--|--|--|--|--|--|--|--|--|--|--|--|--|--|--|--|--|--|--|--|--|--|--|--|--|--|--|--|--|--|--|--|--|--|--|--|--|--|--|--|--|--|--|--|--|--|--|--|--|--|--|--|--|--|--|--|--|--|--|--|--|--|--|--|--|--|--|--|--|--|--|--|--|--|--|--|--|--|--|--|--|--|--|--|--|--|--|--|--|--|--|--|--|--|--|--|--|--|--|--|--|--|--|--|--|--|--|--|--|--|--|--|--|--|--|--|--|--|--|--|--|--|--|--|--|--|--|--|--|--|--|--|--|--|--|--|--|--|--|--|--|--|--|--|--|--|--|--|--|--|--|--|--|--|--|--|--|--|--|--|--|--|--|--|--|--|--|--|--|--|--|--|--|--|--|--|--|--|--|--|--|--|--|--|--|--|--|--|--|--|--|--|--|--|--|--|--|--|--|--|--|--|--|--|--|--|--|--|--|--|--|--|--|--|--|--|--|--|--|--|--|--|--|--|--|--|--|--|--|--|--|--|--|--|--|--|--|--|--|--|--|--|--|--|--|--|--|--|--|--|--|--|--|--|--|--|--|--|--|--|--|--|--|--|--|--|--|--|--|--|--|--|--|--|--|--|--|--|--|--|--|--|--|--|--|--|--|--|--|--|--|--|--|--|--|--|--|--|--|--|--|--|--|--|--|--|--|--|--|--|--|--|--|--|--|--|--|--|--|--|--|--|--|--|--|--|--|--|--|--|--|--|--|--|--|--|--|--|--|--|--|--|--|--|--|--|--|--|--|--|--|--|--|--|--|--|--|--|--|--|--|--|--|--|--|--|--|--|--|--|--|--|--|--|--|--|--|--|--|--|--|--|--|--|--|--|--|--|--|--|--|--|--|--|--|--|--|--|--|--|--|--|--|--|--|--|--|--|--|--|--|--|--|--|--|--|--|--|--|--|--|--|--|--|--|--|--|--|--|--|--|--|--|--|--|--|--|--|--|--|--|--|--|--|--|--|--|--|--|--|--|--|--|--|--|--|--|--|--|--|--|--|--|--|--|--|--|--|--|--|--|--|--|--|--|--|--|--|--|--|--|--|--|--|--|--|--|--|--|--|--|--|--|--|--|--|--|--|--|--|--|--|--|--|--|--|--|--|--|--|--|--|--|--|--|--|--|--|--|--|--|--|--|--|--|--|--|--|--|--|--|--|--|--|--|--|--|--|--|--|--|--|--|--|--|--|--|--|--|--|--|--|--|--|--|--|--|--|--|--|--|--|--|--|--|--|--|--|--|--|--|--|--|--|--|--|--|--|--|--|--|--|--|--|--|--|--|--|--|--|--|--|--|--|--|--|--|--|--|--|--|--|--|--|--|--|--|--|--|--|--|--|--|--|--|--|--|--|--|--|--|--|--|--|--|--|--|--|--|--|--|--|--|--|--|--|--|--|--|--|--|--|--|--|--|--|--|--|--|--|--|--|--|--|--|--|--|--|--|--|--|--|--|--|--|--|--|--|--|--|--|--|--|--|--|--|--|
|  |  |  |  | 20 |  |  |  |  |  |  |  |  |  |  |  |  |  |  |  |  |  |  |  |  |  |  |  |  |  |  |  |  |  |  |  |  |  |  |  |  |  |  |  |  |  |  |  |  |  |  |  |  |  |  |  |  |  |  |  |  |  |  |  |  |  |  |  |  |  |  |  |  |  |  |  |  |  |  |  |  |  |  |  |  |  |  |  |  |  |  |  |  |  |  |  |  |  |  |  |  |  |  |  |  |  |  |  |  |  |  |  |  |  |  |  |  |  |  |  |  |  |  |  |  |  |  |  |  |  |  |  |  |  |  |  |  |  |  |  |  |  |  |  |  |  |  |  |  |  |  |  |  |  |  |  |  |  |  |  |  |  |  |  |  |  |  |  |  |  |  |  |  |  |  |  |  |  |  |  |  |  |  |  |  |  |  |  |  |  |  |  |  |  |  |  |  |  |  |  |  |  |  |  |  |  |  |  |  |  |  |  |  |  |  |  |  |  |  |  |  |  |  |  |  |  |  |  |  |  |  |  |  |  |  |  |  |  |  |  |  |  |  |  |  |  |  |  |  |  |  |  |  |  |  |  |  |  |  |  |  |  |  |  |  |  |  |  |  |  |  |  |  |  |  |  |  |  |  |  |  |  |  |  |  |  |  |  |  |  |  |  |  |  |  |  |  |  |  |  |  |  |  |  |  |  |  |  |  |  |  |  |  |  |  |  |  |  |  |  |  |  |  |  |  |  |  |  |  |  |  |  |  |  |  |  |  |  |  |  |  |  |  |  |  |  |  |  |  |  |  |  |  |  |  |  |  |  |  |  |  |  |  |  |  |  |  |  |  |  |  |  |  |  |  |  |  |  |  |  |  |  |  |  |  |  |  |  |  |  |  |  |  |  |  |  |  |  |  |  |  |  |  |  |  |  |  |  |  |  |  |  |  |  |  |  |  |  |  |  |  |  |  |  |  |  |  |  |  |  |  |  |  |  |  |  |  |  |  |  |  |  |  |  |  |  |  |  |  |  |  |  |  |  |  |  |  |  |  |  |  |  |  |  |  |  |  |  |  |  |  |  |  |  |  |  |  |  |  |  |  |  |  |  |  |  |  |  |  |  |  |  |  |  |  |  |  |  |  |  |  |  |  |  |  |  |  |  |  |  |  |  |  |  |  |  |  |  |  |  |  |  |  |  |  |  |  |  |  |  |  |  |  |  |  |  |  |  |  |  |  |  |  |  |  |  |  |  |  |  |  |  |  |  |  |  |  |  |  |  |  |  |  |  |  |  |  |  |  |  |  |  |  |  |  |  |  |  |  |  |  |  |  |  |  |  |  |  |  |  |  |  |  |  |  |  |  |  |  |  |  |  |  |  |  |  |  |  |  |  |  |  |  |  |  |  |  |  |  |  |  |  |  |  |  |  |  |  |  |  |  |  |  |  |  |  |  |  |  |  |  |  |  |  |  |  |  |  |  |  |  |  |  |  |  |  |  |  |  |  |  |  |  |  |  |  |  |  |  |  |  |  |  |  |  |  |  |  |  |  |  |  |  |  |  |  |  |  |  |  |  |  |  |  |  |  |  |  |  |  |  |  |  |  |  |  |  |  |  |  |  |  |  |  |  |  |  |  |  |  |  |  |  |  |  |  |  |  |  |  |  |  |  |  |  |  |  |  |  |  |  |  |  |  |  |  |  |  |  |  |  |  |  |  |  |  |  |  |  |  |  |  |  |  |  |  |  |  |  |  |  |  |  |  |  |  |  |  |  |  |  |  |  |  |  |  |  |  |  |  |  |  |  |  |  |  |  |  |  |  |  |  |  |  |  |  |  |  |  |  |  |  |  |  |  |  |  |  |  |  |  |  |  |  |  |  |  |  |  |  |  |  |  |  |  |  |  |  |  |  |  |  |  |  |  |  |  |  |  |  |  |  |  |  |  |  |  |  |  |  |  |  |  |  |  |  |  |  |  |  |  |  |  |  |  |  |  |  |  |  |  |  |  |  |  |  |  |  |  |  |  |  |  |  |  |  |  |  |  |  |  |  |  |  |  |  |  |  |  |  |  |  |  |  |  |  |  |  |  |  |  |  |  |  |  |  |  |  |  |  |  |  |  |  |  |  |  |  |  |  |  |  |  |  |  |  |  |  |  |  |  |  |  |  |  |  |  |  |  |  |  |  |  |  |  |  |  |  |  |  |  |  |  |  |  |  |  |  |  |  |  |  |  |  |  |  |  |  |  |  |  |  |  |  |  |  |  |  |  |  |  |  |  |  |  |  |  |  |  |  |  |  |  |  |  |  |  |  |  |  |  |  |  |  |  |  |  |  |  |  |  |  |  |  |  |  |  |  |  |  |  |  |  |  |  |  |  |  |  |  |  |  |  |  |  |  |  |  |  |  |  |  |  |  |  |  |  |  |  |  |  |  |  |  |  |  |  |  |  |  |  |  |  |  |  |  |  |  |  |  |  |  |  |  |  |  |  |  |  |  |  |  |  |  |  |  |  |  |  |  |  |  |  |  |  |  |  |  |  |  |  |  |  |  |  |  |  |  |  |  |  |  |  |  |  |  |  |  |  |  |  |  |  |  |  |  |  |  |  |  |  |  |  |  |  |  |  |  |  |  |  |  |  |  |  |  |  |  |  |  |  |  |  |  |  |  |  |  |  |  |  |  |  |  |  |  |  |  |  |  |  |  |  |  |  |  |  |  |  |  |  |  |  |  |  |  |  |  |  |  |  |  |  |  |  |  |  |  |  |  |  |  |  |  |  |  |  |  |  |  |  |  |  |  |  |  |  |  |  |  |  |  |  |  |  |  |  |  |  |  |  |  |  |  |  |  |  |  |  |  |  |  |  |  |  |  |  |  |  |  |  |  |  |  |  |  |  |  |  |  |  |  |  |  |  |  |  |  |  |  |  |  |  |  |  |  |  |  |  |  |  |  |  |  |  |  |  |  |  |  |  |  |  |  |  |  |  |  |  |  |  |  |  |  |  |  |  |  |  |  |  |  |  |  |  |  |  |  |  |  |  |  |  |  |  |  |  |  |  |  |  |  |  |  |  |  |  |  |  |  |  |  |  |  |  |  |  |  |  |  |  |  |  |  |  |  |  |  |  |  |  |  |  |  |  |  |  |  |  |  |  |  |  |  |  |  |  |  |  |  |  |  |  |  |  |  |  |  |  |  |  |  |  |  |  |  |  |  |  |  |  |  |  |  |  |  |  |  |  |  |  |  |  |  |  |  |  |  |  |  |  |  |  |  |  |  |  |  |  |  |  |  |  |  |  |  |  |  |  |
|--|--|--|--|----|--|--|--|--|--|--|--|--|--|--|--|--|--|--|--|--|--|--|--|--|--|--|--|--|--|--|--|--|--|--|--|--|--|--|--|--|--|--|--|--|--|--|--|--|--|--|--|--|--|--|--|--|--|--|--|--|--|--|--|--|--|--|--|--|--|--|--|--|--|--|--|--|--|--|--|--|--|--|--|--|--|--|--|--|--|--|--|--|--|--|--|--|--|--|--|--|--|--|--|--|--|--|--|--|--|--|--|--|--|--|--|--|--|--|--|--|--|--|--|--|--|--|--|--|--|--|--|--|--|--|--|--|--|--|--|--|--|--|--|--|--|--|--|--|--|--|--|--|--|--|--|--|--|--|--|--|--|--|--|--|--|--|--|--|--|--|--|--|--|--|--|--|--|--|--|--|--|--|--|--|--|--|--|--|--|--|--|--|--|--|--|--|--|--|--|--|--|--|--|--|--|--|--|--|--|--|--|--|--|--|--|--|--|--|--|--|--|--|--|--|--|--|--|--|--|--|--|--|--|--|--|--|--|--|--|--|--|--|--|--|--|--|--|--|--|--|--|--|--|--|--|--|--|--|--|--|--|--|--|--|--|--|--|--|--|--|--|--|--|--|--|--|--|--|--|--|--|--|--|--|--|--|--|--|--|--|--|--|--|--|--|--|--|--|--|--|--|--|--|--|--|--|--|--|--|--|--|--|--|--|--|--|--|--|--|--|--|--|--|--|--|--|--|--|--|--|--|--|--|--|--|--|--|--|--|--|--|--|--|--|--|--|--|--|--|--|--|--|--|--|--|--|--|--|--|--|--|--|--|--|--|--|--|--|--|--|--|--|--|--|--|--|--|--|--|--|--|--|--|--|--|--|--|--|--|--|--|--|--|--|--|--|--|--|--|--|--|--|--|--|--|--|--|--|--|--|--|--|--|--|--|--|--|--|--|--|--|--|--|--|--|--|--|--|--|--|--|--|--|--|--|--|--|--|--|--|--|--|--|--|--|--|--|--|--|--|--|--|--|--|--|--|--|--|--|--|--|--|--|--|--|--|--|--|--|--|--|--|--|--|--|--|--|--|--|--|--|--|--|--|--|--|--|--|--|--|--|--|--|--|--|--|--|--|--|--|--|--|--|--|--|--|--|--|--|--|--|--|--|--|--|--|--|--|--|--|--|--|--|--|--|--|--|--|--|--|--|--|--|--|--|--|--|--|--|--|--|--|--|--|--|--|--|--|--|--|--|--|--|--|--|--|--|--|--|--|--|--|--|--|--|--|--|--|--|--|--|--|--|--|--|--|--|--|--|--|--|--|--|--|--|--|--|--|--|--|--|--|--|--|--|--|--|--|--|--|--|--|--|--|--|--|--|--|--|--|--|--|--|--|--|--|--|--|--|--|--|--|--|--|--|--|--|--|--|--|--|--|--|--|--|--|--|--|--|--|--|--|--|--|--|--|--|--|--|--|--|--|--|--|--|--|--|--|--|--|--|--|--|--|--|--|--|--|--|--|--|--|--|--|--|--|--|--|--|--|--|--|--|--|--|--|--|--|--|--|--|--|--|--|--|--|--|--|--|--|--|--|--|--|--|--|--|--|--|--|--|--|--|--|--|--|--|--|--|--|--|--|--|--|--|--|--|--|--|--|--|--|--|--|--|--|--|--|--|--|--|--|--|--|--|--|--|--|--|--|--|--|--|--|--|--|--|--|--|--|--|--|--|--|--|--|--|--|--|--|--|--|--|--|--|--|--|--|--|--|--|--|--|--|--|--|--|--|--|--|--|--|--|--|--|--|--|--|--|--|--|--|--|--|--|--|--|--|--|--|--|--|--|--|--|--|--|--|--|--|--|--|--|--|--|--|--|--|--|--|--|--|--|--|--|--|--|--|--|--|--|--|--|--|--|--|--|--|--|--|--|--|--|--|--|--|--|--|--|--|--|--|--|--|--|--|--|--|--|--|--|--|--|--|--|--|--|--|--|--|--|--|--|--|--|--|--|--|--|--|--|--|--|--|--|--|--|--|--|--|--|--|--|--|--|--|--|--|--|--|--|--|--|--|--|--|--|--|--|--|--|--|--|--|--|--|--|--|--|--|--|--|--|--|--|--|--|--|--|--|--|--|--|--|--|--|--|--|--|--|--|--|--|--|--|--|--|--|--|--|--|--|--|--|--|--|--|--|--|--|--|--|--|--|--|--|--|--|--|--|--|--|--|--|--|--|--|--|--|--|--|--|--|--|--|--|--|--|--|--|--|--|--|--|--|--|--|--|--|--|--|--|--|--|--|--|--|--|--|--|--|--|--|--|--|--|--|--|--|--|--|--|--|--|--|--|--|--|--|--|--|--|--|--|--|--|--|--|--|--|--|--|--|--|--|--|--|--|--|--|--|--|--|--|--|--|--|--|--|--|--|--|--|--|--|--|--|--|--|--|--|--|--|--|--|--|--|--|--|--|--|--|--|--|--|--|--|--|--|--|--|--|--|--|--|--|--|--|--|--|--|--|--|--|--|--|--|--|--|--|--|--|--|--|--|--|--|--|--|--|--|--|--|--|--|--|--|--|--|--|--|--|--|--|--|--|--|--|--|--|--|--|--|--|--|--|--|--|--|--|--|--|--|--|--|--|--|--|--|--|--|--|--|--|--|--|--|--|--|--|--|--|--|--|--|--|--|--|--|--|--|--|--|--|--|--|--|--|--|--|--|--|--|--|--|--|--|--|--|--|--|--|--|--|--|--|--|--|--|--|--|--|--|--|--|--|--|--|--|--|--|--|--|--|--|--|--|--|--|--|--|--|--|--|--|--|--|--|--|--|--|--|--|--|--|--|--|--|--|--|--|--|--|--|--|--|--|--|--|--|--|--|--|--|--|--|--|--|--|--|--|--|--|--|--|--|--|--|--|--|--|--|--|--|--|--|--|--|--|--|--|--|--|--|--|--|--|--|--|--|--|--|--|--|--|--|--|--|--|--|--|--|--|--|--|--|--|--|--|--|--|--|--|--|--|--|--|--|--|--|--|--|--|--|--|--|--|--|--|--|--|--|--|--|--|--|--|--|--|--|--|--|--|--|--|--|--|--|--|--|--|--|--|--|--|--|--|--|--|--|--|--|--|--|--|--|--|--|--|--|--|--|--|--|--|--|--|--|--|--|--|--|--|--|--|--|--|--|--|--|--|--|--|--|--|--|--|--|--|--|--|--|--|--|--|--|--|--|--|--|--|--|--|--|--|--|--|--|--|--|--|--|--|--|--|--|--|--|--|--|--|--|--|--|--|--|--|--|

420 DxD 440 460 480  
PbTPS-mdiTPS1 DYVYSHWDER GIGWGREDDL AVIDVTAMGL RILRLHGYNV SADVLKTFRD QNGEFLCFSG QTERGVTHML NVNRCSHVAM 442  
PcTPS-mdiTPS1 DYVYSHWDER GIGWGREDDL ALIDVTAMGL RILRLHGYNV SADVLKTFRD QNGEFFRFSG QTERGVTHML NVNRCSHVAM 442  
PcTPS-mdiTPS2 DYVYSHWDER GIGWGREDDL AVIDVTAMGL RILRLHGYNV SEDVLKTFRD QNGEFFCFSG QTERGVTHML NVNRCSHVAM 442  
PcTPS-mdiTPS3 DYVYSHWDER GIGWGREDDL AVIDVTAMGL RILRLHGYNV SADVLKTFRD QNGEFFCFSG QTERGVTHML NVNRCSHVAM 442  
PbTPS-mPIM1 DYVYSHWDER GIGWARENPV AYIDVMATG RILRLHGYNV SSDLKTFRD ENGEFFYRFPG QSERGVTDML NLNRCSHVAF 459  
PcTPS-mPIM1 DYVYSHWDER GIGWARENPV AYIDVMATG RILRLHGYNV SSDLKTFRD ENGEFFYRFPG QSERGVTDML NLNRCSHVAF 459  
PbTPS-mISO1 DYVYSHWGER GIGWARENPV ADIGVTAMGL RILRLNGYNV SSDVLRTFRD ENGEFFSFMG QTERGVTDML NLNRCSHVAF 467  
PcTPS-mISO1 DYVYSHWGER GIGWARENPV ADIGVTAMGL RILRLNGYNV SSDVLRTFRD ENGEFFSFMG QTERGVTDML NLNRCSHVAF 467  
PcTPS-LAS2 DYVYSHWDER GIGWARENPV DIDDTAMGL RILRLHGYNV SSDVLKTFRD ENGEFFCFLG QTQRGVTDML NVNRCSHVAF 441  
PcTPS-LAS1 DYVYSHWDER GIGWARENPV DIDDTAMGL RILRLHGYNV SSDVLKTFRD ENGEFFCFLG QTQRGVTDML NVNRCSHVAF 448  
PbTPS-LAS1 DYVYSHWDER GIGWARENPV DIDDTAMGL RILRLHGYNV SSDVLKTFRD ENGEFFCFLG QTQRGVTDML NVNRCSHVAF 448  
PcTPS-LAS1 DYVYSHWDER GIGWARENPV DIDDTAMGL RILRLHGYNV SSDVLKTFRD ENGEFFCFLG QTQRGVTDML NVNRCSHVAF 441  
PaTPS-ISO DYVYSHWDER GIGWARENPV DIDDTAMGL RILRLHGYNV SSDVLKTFRD ENGEFFCFLG QTQRGVTDML NVNRCSHVAF 458  
PaTPS-LAS DYVYSHWDER GIGWARENPV DIDDTAMGL RILRLHGYNV SSDVLKTFRD ENGEFFCFLG QTQRGVTDML NVNRCSHVAF 450  
AgTPS-AS DYVYSHWDER GIGWARENPV DIDDTAMGL RILRLHGYNV SSDVLKTFRD ENGEFFCFLG QTQRGVTDML NVNRCSHVAF 460  
PgTPS-CPs EYVYRYWTNQ GIGWARDSPV KDVDTSMAF RLLRSHGFDV TAEAFNHFK QDDQFFCFG QTKQVTGMY NLRYASQFSF 383  
PgTPS-eKS DDYRYWMQR ETSREGKSLT DLVSTSI AF MLLRLHGYDV PADVFCCYDL HSIE----- QSGEAVTAML SLRYASQIFM 352

500 520 540 560  
PbTPS-mdiTPS1 PGETVMEAAK LCTERYLRNA LENVDADVWK GLKQNIERGEV EYALKYPWHR SLPRLEARSY IERYGPNVW LGKTMVTPY 522  
PcTPS-mdiTPS1 PGETVMEAAK LCTERYLRNA LENVDADVWK GLKENIRGEV EYALKYPWHR SLPRLEARSY IERYGPNVW LGKTMVTPY 522  
PcTPS-mdiTPS2 PGETVMEAAK LCTERYLRNA LENVDADVWK GLKQNIERGEV EYALKYPWHR SLPRLEARSY IERYGPNVW LGKTMVTPY 522  
PcTPS-mdiTPS3 PGETVMEAAK LCTERYLRNA LENVDADVWK CLKQNIERGEV EYALKYPWHR SLPRLEARSY IERYGPNVW LGKTMVTPY 522  
PbTPS-mPIM1 PGETVMEAAK LCTERYLRNA LENVNPLDKW DLKENIRGEV EYALKYPWLR RLPRLETRNY IEHYGANDVW LGKMMHMPY 539  
PcTPS-mPIM1 PGETVMEAAK LCTERYLRNA LENVNPLDKW GLKENIRGEV EYALKYPWLR RLPRLETRNY IEHYGANDVW LGKMMHMPY 539  
PbTPS-mISO1 PGETVMEAAK LCTERYLRNA LEDVDADVWK GLKQNIERGEV EYALKYPWLR SLPRLEARSY IERYGPNVW LGKTMVTPY 547  
PcTPS-mISO1 PGETVMEAAK LCTERYLRNA LEDVDADVWK GLKQNIERGEV EYALKYPWLR SLPRLEARSY IERYGPNVW LGKTMVTPY 547  
PcTPS-LAS2 PGETVMEAAK LCTERYLRNA LEDTGAFDKW ALKKNIRGEV EYALKYPWHR SMPRLEARSY IERYGPNVW LGKTMVTPY 521  
PcTPS-LAS1 PGETVMEAAK LCTERYLRNA LEDTGAFDKW ALKKNIRGEV EYALKYPWHR SMPRLEARSY IERYGPNVW LGKTMVTPY 528  
PbTPS-LAS1 PGETVMEAAK LCTERYLRNA LEDTGAFDKW ALKKNIRGEV EYALKYPWHR SMPRLEARSY IERYGPNVW LGKTMVTPY 528  
PcTPS-LAS1 PGETVMEAAK LCTERYLRNA LEDTGAFDKW ALKKNIRGEV EYALKYPWHR SMPRLEARSY IERYGPNVW LGKTMVTPY 521  
PcTPS-LAS1 PGETVMEAAK LCTERYLRNA LEDTGAFDKW ALKKNIRGEV EYALKYPWHR SMPRLEARSY IERYGPNVW LGKTMVTPY 528  
PaTPS-ISO PGETVMEAAK LCTERYLRNA LEDVGAFDKW ALKKNIRGEV EYALKYPWHR SMPRLEARSY IEHYGANDVW LGKTMVTPY 538  
PaTPS-LAS PGETVMEAAK LCTERYLRNA LEDVGAFDKW ALKKNIRGEV EYALKYPWHR SMPRLEARSY IEHYGANDVW LGKTMVTPY 530  
AgTPS-AS PGETVMEAAK LCTERYLRNA LENVDADVWK AFKKNIRGEV EYALKYPWHR SMPRLEARSY IERYGPNVW LGKTMVTPY 540  
PgTPS-CPs PGETVMEAAK LCTERYLRNA LENVDADVWK AFKKNIRGEV EYALKYPWHR SMPRLEARSY IERYGPNVW LGKTMVTPY 540  
PgTPS-eKS PGETVMEAAK LCTERYLRNA LENVDADVWK AFKKNIRGEV EYALKYPWHR SMPRLEARSY IERYGPNVW LGKTMVTPY 540

580 RRWW 600 620 640  
PbTPS-mdiTPS1 INNGKYLELA KLDFFNNVQSM QQKEILELRR WKKSSGFAEL NFRDRVAEI YFSIASTMFE PELATCRAIF TKTTVCLVIL 602  
PcTPS-mdiTPS1 INNGKYLELA KLDFFNNVQSM QQKEILELRR WKKSSGFAEL NFRDRVAEI YFSIASTMFE PELATCRAIF TKTTVCLVIL 602  
PcTPS-mdiTPS2 INNGKYLELA KLDFFNNVQSM QQKEILELRR WKKSSGFAEL NFRDRVAEI YFSIASTMFE PELATCRAIF TKTTVCLVIL 602  
PcTPS-mdiTPS3 INNGKYLELA KLDFFNNVQSM QQKEILELRR WKKSSGFAEL NFRDRVAEI YFSIASTMFE PELATCRAIF TKTTVCLVIL 602  
PbTPS-mPIM1 INDRKYLELA KLDFFNNVQSI HQKELRELRR WKKSSGFAEL NFRDRVAEI YFSIASTMFE PELATCRAIF TKTTVCLVIL 619  
PcTPS-mPIM1 INDRKYLELA KLDFFNNVQSI HQKELRELRR WKKSSGFAEL NFRDRVAEI YFSIASTMFE PELATCRAIF TKTTVCLVIL 619  
PbTPS-mISO1 INNGKYLELA KLDFFNNVQSI HQKELRELRR WKKSSGFAEL NFRDRVAEI YFSIASTMFE PELATCRAIF TKTTVCLVIL 627  
PcTPS-mISO1 INNGKYLELA KLDFFNNVQSI HQKELRELRR WKKSSGFAEL NFRDRVAEI YFSIASTMFE PELATCRAIF TKTTVCLVIL 627  
PcTPS-LAS2 ISNEKYLELA KLDFFNNVQFF HQKELRELRR WKKSSGFAEL NFRDRVAEI YFSIASTMFE PELATCRAIF TKTTVCLVIL 601  
PcTPS-LAS1 ISNEKYLELA KLDFFNNVQFF HQKELRELRR WKKSSGFAEL NFRDRVAEI YFSIASTMFE PELATCRAIF TKTTVCLVIL 608  
PbTPS-LAS1 ISNEKYLELA KLDFFNNVQFF HQKELRELRR WKKSSGFAEL NFRDRVAEI YFSIASTMFE PELATCRAIF TKTTVCLVIL 601  
PcTPS-LAS1 ISNEKYLELA KLDFFNNVQFF HQKELRELRR WKKSSGFAEL NFRDRVAEI YFSIASTMFE PELATCRAIF TKTTVCLVIL 608  
PaTPS-ISO ISNEKYLELA KLDFFNNVQSI HQKELRELRR WKKSSGFAEL NFRDRVAEI YFSIASTMFE PELATCRAIF TKTTVCLVIL 618  
PaTPS-LAS ISNEKYLELA KLDFFNNVQSI HQKELRELRR WKKSSGFAEL NFRDRVAEI YFSIASTMFE PELATCRAIF TKTTVCLVIL 618  
AgTPS-AS ISNEKYLELA KLDFFNNVQSI HQKELRELRR WKKSSGFAEL NFRDRVAEI YFSIASTMFE PELATCRAIF TKTTVCLVIL 620  
PgTPS-CPs ISNEKYLELA KLDFFNNVQSI HQKELRELRR WKKSSGFAEL NFRDRVAEI YFSIASTMFE PELATCRAIF TKTTVCLVIL 620  
PgTPS-eKS ISNDLELALA KQDYNICQSI HQKELRELRR WKKSSGFAEL NFRDRVAEI YFSIASTMFE PELATCRAIF TKTTVCLVIL 512

660 DDxxD 680 700 720  
PbTPS-mdiTPS1 DDLYDTHAS - LENIKLFNEA FKRWDLSLLD RMQEHMKICF LALYNLVNEI AQEGRERQGH DVLGYIRNLW ELVLEAYTNE 681  
PcTPS-mdiTPS1 DDLYDTHAS - LESIKLFNEA FERWDLSSLD RMQEHMKICF LALYNLVNEI AQEGRERQGH DVLGYIRNLW ELVLEAYTNE 681  
PcTPS-mdiTPS2 DDLYDTHAS - LENIKLFNEA FKRWDLSLLD RMQEHMKICF LALYNLVNEI AQEGRERQGH DVLGYIRNLW ELVLEAYTNE 681  
PcTPS-mdiTPS3 DDLYDTHAS - LENIKLFNEA FKRWDLSLLD RMQEHMKICF LALYNLVNEI AQEGRERQGH DVLGYIRNLW ELVLEAYTNE 681  
PbTPS-mPIM1 DGFYDVHGS - AEDIMLFNEA VKRWDLSLLD RMQEHMKICF LALYNLVNEI AQEGRERQGH DVLGYIRNLW ELVLEAYTNE 698  
PcTPS-mPIM1 DGFYDVHGS - AEDIMLFNEA VKRWDLSLLD RMQEHMKICF LALYNLVNEI AQEGRERQGH DVLGYIRNLW ELVLEAYTNE 698  
PbTPS-mISO1 DDLYDAHGS - VEDIKLFNEA VKRWDLSLLD RMQEHMKICF LALYNLVNEI AQEGRERQGH DVLGYIRNLW ELVLEAYTNE 706  
PcTPS-mISO1 DDLYDAHGS - VEDIKLFNEA VKRWDLSLLD RMQEHMKICF LALYNLVNEI AQEGRERQGH DVLGYIRNLW ELVLEAYTNE 706  
PcTPS-LAS2 DDLYDAHGT - LDNLKLFSES VKRWDLSLLD QMPQDMKICF KGFYNTFNEI AQEGRERQGH DVLGYIRNLW ELVLEAYTNE 680  
PcTPS-LAS1 DDLYDAHGT - LDNLKLFSES VKRWDLSLLD QMPQDMKICF KGFYNTFNEI AQEGRERQGH DVLGYIRNLW ELVLEAYTNE 687  
PbTPS-LAS1 DDLYDAHGT - LDNLKLFSES VKRWDLSLLD QMPQDMKICF KGFYNTFNEI AQEGRERQGH DVLGYIRNLW ELVLEAYTNE 687  
PaTPS-LAS DDLYDAHGT - LDNLKLFSES VKRWDLSLLD QMPQDMKICF KGFYNTFNEI AQEGRERQGH DVLGYIRNLW ELVLEAYTNE 680  
PaTPS-ISO DDLYDAHGT - LDNLKLFSES VKRWDLSLLD QMPQDMKICF KGFYNTFNEI AQEGRERQGH DVLGYIRNLW ELVLEAYTNE 697  
PaTPS-LAS DDLYDAHGT - LDNLKLFSES VKRWDLSLLD QMPQDMKICF KGFYNTFNEI AQEGRERQGH DVLGYIRNLW ELVLEAYTNE 689  
AgTPS-AS DDLYDAHGS - LDDLKLFSES VKRWDLSLLD QMPQDMKICF KGFYNTFNEI AQEGRERQGH DVLGYIRNLW ELVLEAYTNE 699  
PgTPS-CPs RIFFSGENCFF AHHRQQLDA FTRWDGRAMR DSNPSAKRLF SCFLRMVNLF SVQGVVQGR DISGDLRHRW EHWLAS - - - - - 620  
PgTPS-eKS DDFDVGSS - EEIHSFVEA VRVWDEAATD GLSENVQILF SALYNTVDEI VQQAFFVQGR DISIHLREIW YRLVNSMMTE 591

740 NSE/DTE 760 780 800  
PbTPS-mdiTPS1 AE-WSEAEFV PSFHEYIATA SISVSGPTLI LICVPLFTG-E LLTDHILSQI NYRSKFAYLI GLIGRLNDT KTYQAERGQ 759  
PcTPS-mdiTPS1 AE-WSEAEFV PSFHEYIATA SISVSGPTLI LICVPLFTG-E LLTDHILSQI NYRSKFAYLI GLIGRLNDT KTYQAERGQ 759  
PcTPS-mdiTPS2 AE-WSEAEFV PSFHEYIATA SISVSGPTLI LICVPLFTG-E LLTDHILSQI NYRSKFAYLI GLIGRLNDT KTYQAERGQ 759  
PcTPS-mdiTPS3 AE-WSEAEFV PSFHEYIATA SISVSGPTLI LICVPLFTG-E LLTDHILSQI NYRSKFAYLI GLIGRLNDT KTYQAERGQ 759  
PbTPS-mPIM1 AE-WSRAEHV PSFHEYIATA AISSALPTLV LIGVIFFTG-E VLTDHILSQI NYRSKFAYLI GLIGRLNDT KTYQAERGQ 776  
PcTPS-mPIM1 AE-WSRAEHV PSFHEYIATA AISSALPTLV LIGVIFFTG-E VLTDHILSQI NYRSKFAYLI GLIGRLNDT KTYQAERGQ 776  
PbTPS-mISO1 AE-WSEAKYV PSFHEYIATA SVSIALGTIV LISALFTG-E VLTDHILSQI NYRSKFAYLI GLIGRLNDT KTYQAERGQ 784  
PcTPS-mISO1 AE-WSEAKYV PSFHEYIATA SVSIALGTIV LISALFTG-E VLTDHILSQI NYRSKFAYLI GLIGRLNDT KTYQAERGQ 784  
PcTPS-LAS2 AE-WSAVRYV PSYDEYIENA SVSIALGTIV LISALFTG-E VLTDHILSQI NYRSKFAYLI GLIGRLNDT KTYQAERGQ 758  
PcTPS-LAS1 AE-WSAVRYV PSYDEYIENA SVSIALGTIV LISALFTG-E VLTDHILSQI NYRSKFAYLI GLIGRLNDT KTYQAERGQ 765  
PbTPS-LAS1 AE-WSAVRYV PSYDEYIENA SVSIALGTIV LISALFTG-E VLTDHILSQI NYRSKFAYLI GLIGRLNDT KTYQAERGQ 765  
PaTPS-LAS AE-WSAVRYV PSYDEYIENA SVSIALGTIV LISALFTG-E VLTDHILSQI NYRSKFAYLI GLIGRLNDT KTYQAERGQ 758  
PaTPS-ISO AE-WSAARYV PSFHEYIENA SVSIALGTIV LISALFTG-E VLTDHILSQI NYRSKFAYLI GLIGRLNDT KTYQAERGQ 775  
PaTPS-LAS AE-WSAARYV PSFHEYIENA SVSIALGTIV LISALFTG-E VLTDHILSQI NYRSKFAYLI GLIGRLNDT KTYQAERGQ 767  
AgTPS-AS AE-WSAARYV PSFHEYIENA SVSIALGTIV LISALFTG-E VLTDHILSQI NYRSKFAYLI GLIGRLNDT KTYQAERGQ 777  
PgTPS-CPs AEDLTDAQD - - - - - HEKLGTE A - - - - - EIV VLTAAFLGRE TISPDLISHP DSS - IMKVT NTVCSLLRI ATYKEE - - - - - 686  
PgTPS-eKS AQ-WARTHCL PSMHEYMENA EPSIALEPIV LSSLYFVGPK -LSEEI ICHP EYVN-LMHLL NICGRLLNDI QGCKREAHQ 668

|               |                 |            |             |            |               |            |                 |               |            |            |     |  |  |  |     |  |  |  |  |     |  |
|---------------|-----------------|------------|-------------|------------|---------------|------------|-----------------|---------------|------------|------------|-----|--|--|--|-----|--|--|--|--|-----|--|
|               |                 |            |             | 820        |               |            |                 |               | 840        |            |     |  |  |  | 860 |  |  |  |  | 880 |  |
|               |                 |            |             | ↓          |               |            |                 |               | ↓          |            |     |  |  |  | ↓   |  |  |  |  | ↓   |  |
| PbTPS-mdiTPS1 | EVVSAIQCYM      | KEHPEISEEE | ALEYVYTLL   | E          | KA            | ADFKCEY    | LKTK-QYVPN      | NCRRLFFDHV    | RLMQLFYNER | DGFTTHSDME | 838 |  |  |  |     |  |  |  |  |     |  |
| PcTPS-mdiTPS1 | EVVSAIQCYM      | KEHPEISEEE | ALEYVYTLL   | E          | KA            | ADFKCEY    | LKTK-QYVPN      | NCRRLFFDHV    | RLMQLFYNER | DGFTTHSDME | 838 |  |  |  |     |  |  |  |  |     |  |
| PcTPS-mdiTPS2 | EVVSAIQCYM      | KEHPEISEEE | ALEYVYTLL   | E          | NA            | ADFKCEY    | LKTK-QYVPN      | NCRRLFFDHV    | RLMQLFYKER | DGFTTHSDRE | 838 |  |  |  |     |  |  |  |  |     |  |
| PcTPS-mdiTPS3 | EVVSAIQCYM      | KEHPEISEEE | ALEYVYTLL   | E          | KA            | ADFKWEY    | LKTK-QYVPN      | NCRRLFFDHV    | RLMQLFYKER | DGFTTHSDME | 838 |  |  |  |     |  |  |  |  |     |  |
| PbTPS-mPIM1   | EVASAIQCYM      | KENPELSEEE | ALEYIYRLME  | NALADFKREF | LKTK-D-VPE    | YCRRLVFDNA | RSMQLIYMEG      | DGFKLSHETE    | 854        |            |     |  |  |  |     |  |  |  |  |     |  |
| PcTPS-mPIM1   | EVASAIQCYM      | KENPELSEEE | ALEYIYRLME  | NALADFKREF | LNTK-D-VPE    | YCRRLVFDNA | RSMQLIYMEG      | DGFKLSHETE    | 854        |            |     |  |  |  |     |  |  |  |  |     |  |
| PbTPS-mISO1   | EVASAIQCYM      | KDHPEFSEEE | ALKQIYTLME  | NALADLKEEF | LKAK-D-VPD    | KCKRLVFDYA | RSMQLFYQQG      | DGFTLAPNME    | 862        |            |     |  |  |  |     |  |  |  |  |     |  |
| PcTPS-mISO1   | EVASAIQCYM      | KDHPEFSEEE | ALKQIYTLME  | NALSDLKEEF | LKAK-D-VPD    | KCKRLVFDYA | RSMQLFYQQG      | DGFTLAPNME    | 862        |            |     |  |  |  |     |  |  |  |  |     |  |
| PcTPS-LAS2    | EVASAVQCYM      | KDHPEISEEE | ALKHVYTIMD  | NALDELNREF | VNNR-D-VPD    | TCRRLVFETA | RIMQLFYMDG      | DGLTLSHNME    | 836        |            |     |  |  |  |     |  |  |  |  |     |  |
| PcTPS-LAS1    | EVASAVQCYM      | KDHPEISEEE | ALKHVYTIMD  | NALDELNREF | VNNR-D-VPD    | TCRRLVFETA | RIMQLFYMDG      | DGLTLSHNME    | 843        |            |     |  |  |  |     |  |  |  |  |     |  |
| PbTPS-LAS1    | EVASAVQCYM      | KDHPEISEEE | ALKHVYTIMD  | NALDELNREF | VNNR-D-VPD    | TCRRLVFETA | RIMQLFYMDG      | DGLTLSHNME    | 843        |            |     |  |  |  |     |  |  |  |  |     |  |
| PtTPS-LAS     | EVASAVQCYM      | KDHPEISEEE | ALKHVYTIMD  | NALDELNREF | VNNR-D-VPD    | TCRRLVFETA | RIMQLFYMDG      | DGLTLSHNME    | 836        |            |     |  |  |  |     |  |  |  |  |     |  |
| PaTPS-ISO     | EVASAVQCYM      | KEHPEISEEE | ALKHVYTVME  | NALDELNREF | VNNR-D-VPD    | SCRRLVFETA | RIMQLFYMEG      | DGLTLSHEME    | 853        |            |     |  |  |  |     |  |  |  |  |     |  |
| PaTPS-LAS     | EVASAVQCYM      | KDHPEISEEE | ALKHVYTVME  | NALDELNREF | VNNR-E-VPD    | SCRRLVFETA | RIMQLFYMDG      | DGLTLSHETE    | 845        |            |     |  |  |  |     |  |  |  |  |     |  |
| AgTPS-AS      | EVASAIQCYM      | KDHPEISEEE | ALQHVVYSVME | NALDELNREF | VNNK--IPD     | IYKRLVFETA | RIMQLFYMQG      | DGLTLSHME     | 854        |            |     |  |  |  |     |  |  |  |  |     |  |
| PgTPS-CPS     | - - - - - C - - | -DSPSGTEED | - -DRLKRRAE | EGMGHLVRAV | YRHQYSPVPS    | GVKRLCLVVG | KS - - - FYFA - | - - - AHCNNEE | 747        |            |     |  |  |  |     |  |  |  |  |     |  |
| PgTPS-eKS     | KL-NSVTLYM      | EENSQTMMED | AIVYLKRTID  | ESRQLLLKEV | L - - RPSIVPR | ECKQLHWNMM | RILQLFYLKN      | DGFT - - SPT  | 743        |            |     |  |  |  |     |  |  |  |  |     |  |
|               |                 |            |             |            |               |            |                 |               |            |            |     |  |  |  |     |  |  |  |  |     |  |
| PbTPS-mdiTPS1 | IKERVKKVLF      | EPVA*      | 853         |            |               |            |                 |               |            |            |     |  |  |  |     |  |  |  |  |     |  |
| PcTPS-mdiTPS1 | IKERVKKVLF      | EPVA*      | 853         |            |               |            |                 |               |            |            |     |  |  |  |     |  |  |  |  |     |  |
| PcTPS-mdiTPS2 | IKERVKKVLF      | EPVA*      | 853         |            |               |            |                 |               |            |            |     |  |  |  |     |  |  |  |  |     |  |
| PcTPS-mdiTPS3 | IKERVKKVLF      | EPVA*      | 853         |            |               |            |                 |               |            |            |     |  |  |  |     |  |  |  |  |     |  |
| PbTPS-mPIM1   | IKEHVKKILF      | EPVA*      | 869         |            |               |            |                 |               |            |            |     |  |  |  |     |  |  |  |  |     |  |
| PcTPS-mPIM1   | IKQHVKKILF      | EPVA*      | 869         |            |               |            |                 |               |            |            |     |  |  |  |     |  |  |  |  |     |  |
| PbTPS-mISO1   | IKQHVKKILF      | EPVP*      | 877         |            |               |            |                 |               |            |            |     |  |  |  |     |  |  |  |  |     |  |
| PcTPS-mISO1   | IKQHVKKILF      | EPVP*      | 877         |            |               |            |                 |               |            |            |     |  |  |  |     |  |  |  |  |     |  |
| PcTPS-LAS2    | IKEHVKNCLF      | QPVA*      | 851         |            |               |            |                 |               |            |            |     |  |  |  |     |  |  |  |  |     |  |
| PcTPS-LAS1    | IKEHVKNCLF      | QPVA*      | 858         |            |               |            |                 |               |            |            |     |  |  |  |     |  |  |  |  |     |  |
| PbTPS-LAS1    | IKEHVKNCLF      | QPVA*      | 858         |            |               |            |                 |               |            |            |     |  |  |  |     |  |  |  |  |     |  |
| PtTPS-LAS     | IKEHVKNCLF      | QPVA*      | 850         |            |               |            |                 |               |            |            |     |  |  |  |     |  |  |  |  |     |  |
| PaTPS-ISO     | IKEHVKNCLF      | QPVA*      | 868         |            |               |            |                 |               |            |            |     |  |  |  |     |  |  |  |  |     |  |
| PaTPS-LAS     | IKEHVKNCLF      | QPVA*      | 860         |            |               |            |                 |               |            |            |     |  |  |  |     |  |  |  |  |     |  |
| AgTPS-AS      | IKEHVKNCLF      | QPVA*      | 869         |            |               |            |                 |               |            |            |     |  |  |  |     |  |  |  |  |     |  |
| PgTPS-CPS     | VGNHVETVLF      | QPVY*      | 762         |            |               |            |                 |               |            |            |     |  |  |  |     |  |  |  |  |     |  |
| PgTPS-eKS     | MLGYVNAVIV      | DPIL*      | 758         |            |               |            |                 |               |            |            |     |  |  |  |     |  |  |  |  |     |  |

**Figure S1. Complete amino acid alignment of the FL diTPS from jack pine and lodgepole pine with select previously characterized conifer diTPS.** Amino acid residues that differ in more than 50% of the proteins are coloured in grey. Select conserved motifs are highlighted. Abbreviations: *Pbmd*iTPS1, *Pinus banksiana* monofunctional diTPS1; *Pcmd*iTPS1, *Pinus contorta* monofunctional diTPS1; *Pcmd*iTPS2, *P. contorta* monofunctional diTPS2; *Pcmd*iTPS3, *P. contorta* monofunctional diTPS3; *Pbm*PIM1, *P. banksiana* monofunctional pimaradiene synthase 1; *Pcm*PIM1, *P. contorta* monofunctional pimaradiene synthase 1; *Pbm*ISO1, *P. banksiana* monofunctional isopimaradiene synthase 1; *Pcm*ISO1, *P. contorta* monofunctional isopimaradiene synthase 1; *Pc*LAS2, *P. contorta* levopimaradiene/abietadiene synthase 2; *Pc*LAS1, *P. contorta* levopimaradiene/abietadiene synthase 1; *Pb*LAS2, *P. banksiana* levopimaradiene/abietadiene synthase 1; *Pt*LAS, *P. taeda* levopimaradiene/abietadiene synthase; *Pa*ISO, *Picea abies* isopimaradiene synthase; *Pa*LAS, *P. abies* levopimaradiene/abietadiene synthase; *Ag*AS, *Abies grandis* levopimaradiene/abietadiene synthase; *Pg*CPS, *Picea glauca* copalyl diphosphate synthase; *Pge*KS, *P. glauca* ent-kaurene synthase.
