# Supplementary material for: Evolution of Conifer Diterpene Synthases: Diterpene Resin Acid Biosynthesis in Lodgepole Pine and Jack Pine Involves Monofunctional and Bifunctional Diterpene Synthases
Source: Oxford University Press journal article supplement (doi:10.1104/pp.112.208546), 2012-12-12
Supplement: plphys_v161_2_600_s1.zip [file plphys_v161_2_600_s1.zip › 208546Figure_S2.pdf]

**Figure S2**

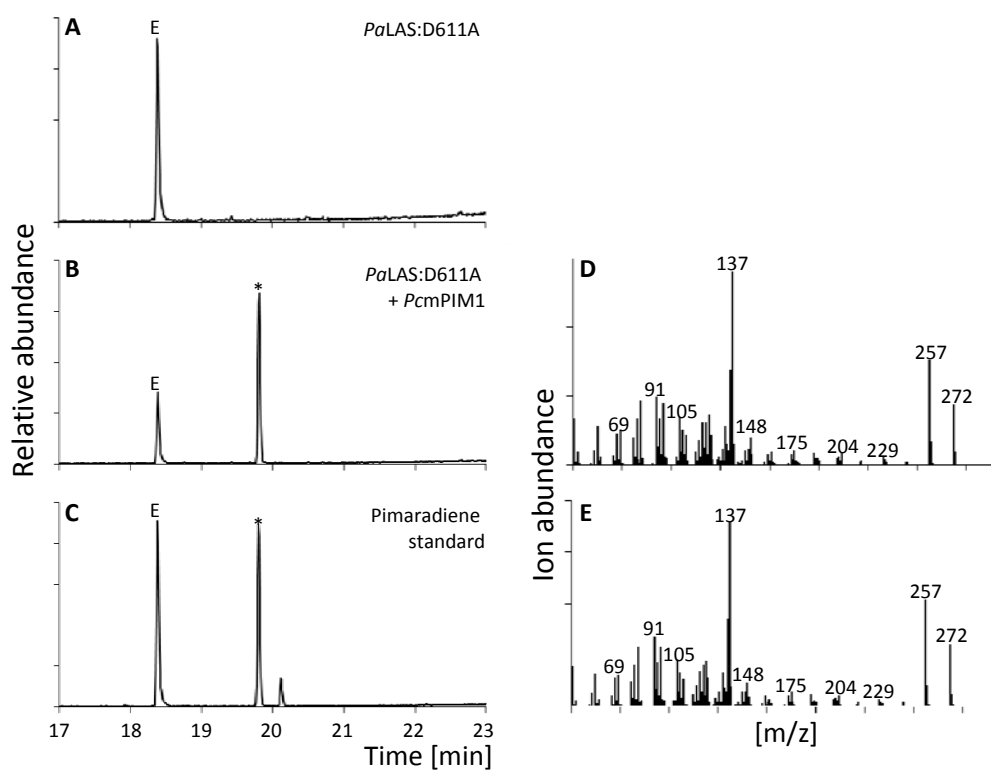

**Figure S2. Diterpene product profiles of *PcmPIM1*.** GC-MS analysis of reaction products of [A] *PaLAS:D611A*, [B] *PaLAS:D611A* combined with *PcmPIM1*, in comparison to a [C] pimaradiene standard. [D-E] mass spectra of reaction products marked with an asterisk in [B] and [C]. E internal standard 1-eicosene.
