# Supplementary material for: Evolution of Conifer Diterpene Synthases: Diterpene Resin Acid Biosynthesis in Lodgepole Pine and Jack Pine Involves Monofunctional and Bifunctional Diterpene Synthases
Source: Oxford University Press journal article supplement (doi:10.1104/pp.112.208546), 2012-12-12
Supplement: plphys_v161_2_600_s1.zip [file plphys_v161_2_600_s1.zip › 208546Figure_S4.pdf]

**Figure S4**

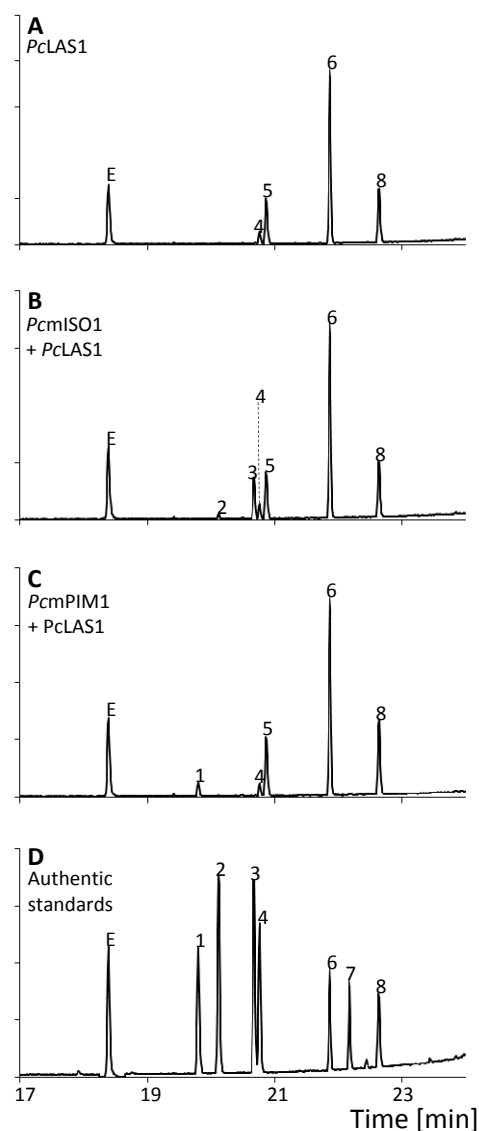

**Figure S4. Diterpene product profiles of coupled assays with monofunctional *PcmISO1* or *PcmPIM1* and bifunctional *PcLAS1*.** GC-MS analysis of reaction products from coupled enzyme assays of monofunctional *PcmPIM1* and *PcmISO1* with bifunctional *PcLAS1*, indicating the conversion of (+)-CPP, released from the LAS class II active site, to the different pimaradienes through the class I activity of *PcmPIM1* and *PcmISO1*. Product profiles, with GGPP as substrate, of [A] *PcLAS1*, [B] *PcLAS1* combined with *PcmISO1* and [C] *PcLAS1* combined with *PcmPIM1*. [D] Authentic standards: 1 pimaradiene, 2 sandaracopimaradiene, 3 isopimaradiene, 4 palustradiene, 5 levopimaradiene, 6 abietadiene, 7 dehydroabietadiene, 8 neoabietadiene, E internal standard 1-eicosene.
