# Supplementary material for: Evolution of Conifer Diterpene Synthases: Diterpene Resin Acid Biosynthesis in Lodgepole Pine and Jack Pine Involves Monofunctional and Bifunctional Diterpene Synthases
Source: Oxford University Press journal article supplement (doi:10.1104/pp.112.208546), 2012-12-12
Supplement: plphys_v161_2_600_s1.zip [file plphys_v161_2_600_s1.zip › 208546Figure_S6.pdf]

**Figure S6**

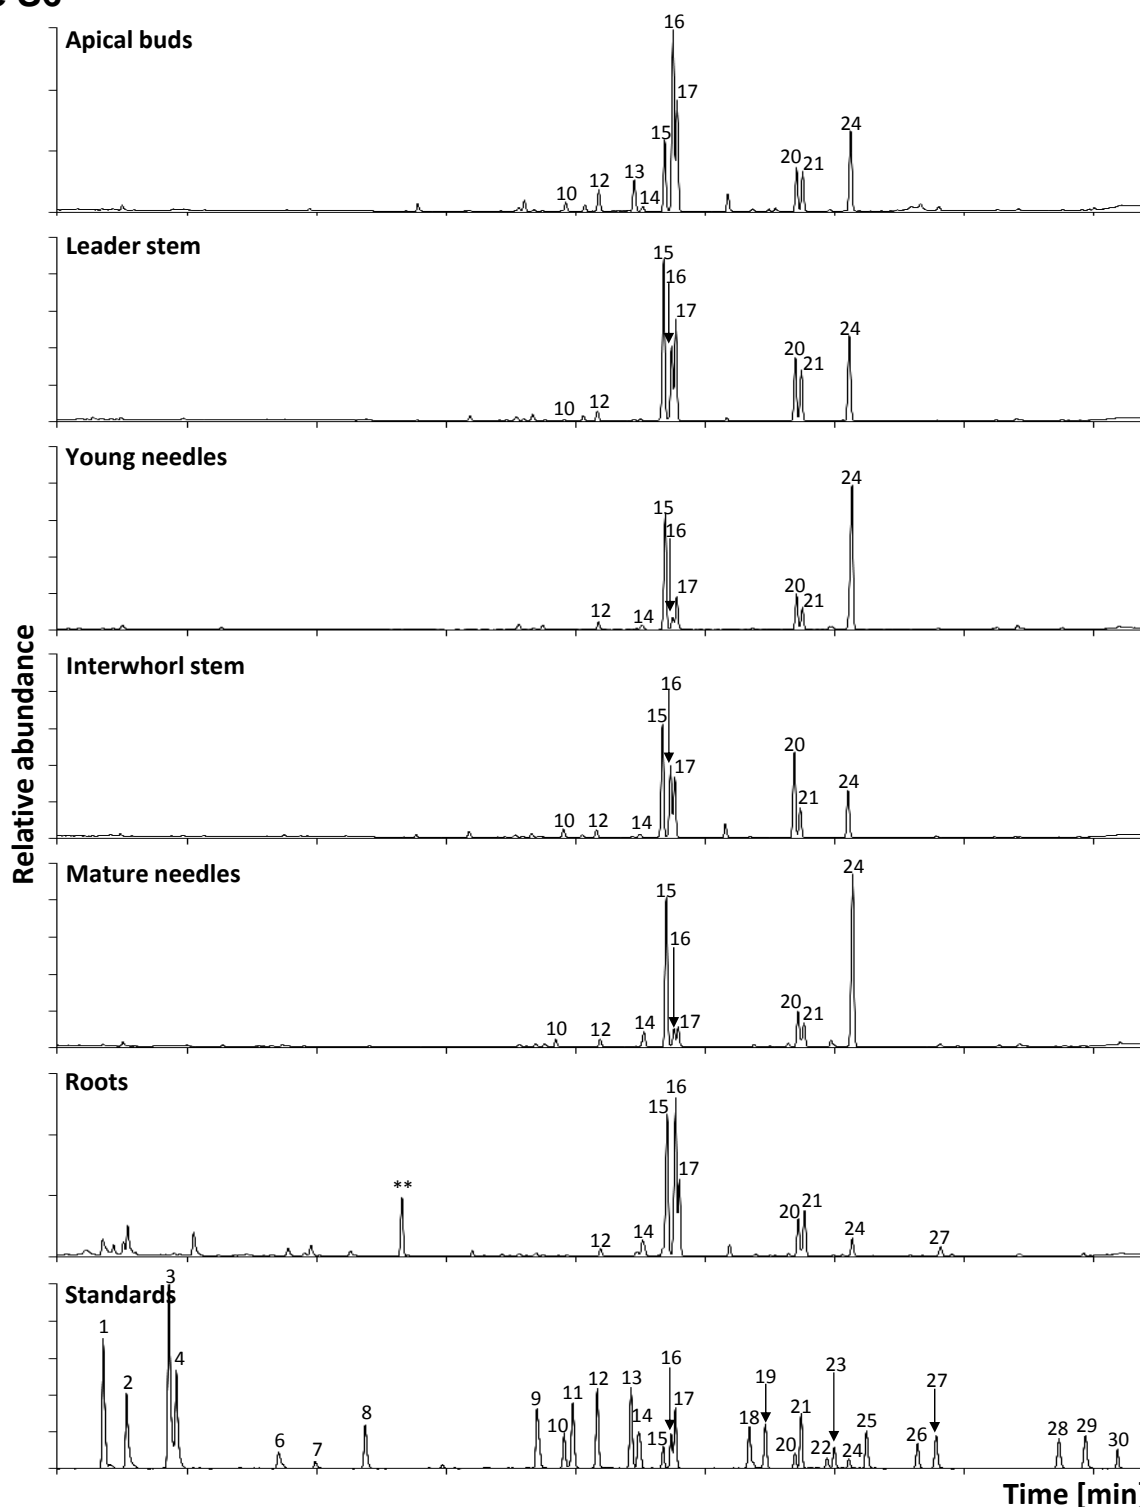

**Figure S6. Representative GC-MS traces of the diterpene olefin, alcohol, aldehyde and resin acid content of oleoresin extracts from six tissue types of lodgepole pine.** 1 pimaradiene, 2 sandaracopimaradiene, 3 isopimaradiene, 4 palustradiene, 5 levopimaradiene, 6 abietadiene, 7 dehydroabietadiene, 8 neoabietadiene, 9 pimaradienal, 10 pimaric acid, 11 sandaracopimaradienal, 12 sandaracopimaric acid, 13 palustradienal, 14 isopimaradienal, 15 levopimaric acid, 16 palustic acid, 17 isopimaric acid, 18 abietadienal, 19 dehydroabietanal, 20 abietic acid, 21 dehydroabietic acid, 22 neoabietadienal, 23 pimaradienol, 24 neoabietic acid, 25 sandaracopimaradienol, 26 palustradienol, 27 isopimaradienol, 28 abietadienol, 29 dehydroabietadienol, 30 neoabietadienol; \* compound with  $m/z$  consistent with eicosanoic acid methyl ester, \*\* compound with  $m/z$  consistent with thunbergol, \*\*\* compound with  $m/z$  consistent with 3,5-dimethoxy stilbene
