# Supplementary material for: Evolution of Conifer Diterpene Synthases: Diterpene Resin Acid Biosynthesis in Lodgepole Pine and Jack Pine Involves Monofunctional and Bifunctional Diterpene Synthases
Source: Oxford University Press journal article supplement (doi:10.1104/pp.112.208546), 2012-12-12
Supplement: plphys_v161_2_600_s1.zip [file plphys_v161_2_600_s1.zip › 208546Table_S2_formatted.pdf]

**Table S2. Relative amount of individual diterpenes produced by the recombinant diTPS characterized in this study.** Major reaction products are highlighted in **bold**. Products representing greater than 1% of the total are reported. Values are given as the average of at least 5 replicates.

| Protein #1                    | Protein #2     | pimaradiene        | sandaracopimaradiene | isopimaradiene      | palustradiene | levopimaradiene | abietadiene         | dehydroabietadiene | neoabietadiene |
|-------------------------------|----------------|--------------------|----------------------|---------------------|---------------|-----------------|---------------------|--------------------|----------------|
| <i><u>Pinus banksiana</u></i> |                |                    |                      |                     |               |                 |                     |                    |                |
| <i>PaD611A</i>                | <i>PbmISO1</i> |                    | 12.2 ± 0.027         | <b>87.8 ± 0.027</b> |               |                 |                     |                    |                |
| <i>PaD611A</i>                | <i>PbmPIM1</i> | <b>95.1 ± 1.1</b>  | 1.66 ± 0.023         |                     |               |                 | 1.73 ± 0.62         |                    |                |
| <i>PbLAS1</i> *               |                |                    |                      |                     | 2.12 ± 0.0077 | 6.58 ± 0.049    | <b>81.1 ± 0.084</b> |                    | 8.75 ± 0.037   |
| <i>PbLAS1</i>                 | <i>PbmISO1</i> |                    | 1.26 ± 0.087         | 7.98 ± 0.73         | 2.08 ± 0.022  | 5.87 ± 0.053    | <b>74.1 ± 0.83</b>  |                    | 7.71 ± 0.037   |
| <i>PbLAS1</i>                 | <i>PbmPIM1</i> | 1.64 ± 0.0088      |                      |                     | 2.09 ± 0.040  | 6.47 ± 0.39     | <b>79.9 ± 0.74</b>  |                    | 8.53 ± 0.32    |
| <i><u>Pinus contorta</u></i>  |                |                    |                      |                     |               |                 |                     |                    |                |
| <i>PaD611A</i>                | <i>PcmISO1</i> |                    | 10.5 ± 0.37          | <b>89.5 ± 0.37</b>  |               |                 |                     |                    |                |
| <i>PaD611A</i>                | <i>PcmPIM1</i> | <b>99.2 ± 0.15</b> |                      |                     |               |                 |                     |                    |                |
| <i>PcLAS2</i>                 |                |                    |                      |                     | 2.16 ± 0.066  | 9.73 ± 0.69     | <b>72.2 ± 2.2</b>   | 3.37 ± 2.0         | 12.2 ± 0.66    |
| <i>PcLAS1</i> *               |                |                    |                      |                     | 2.06 ± 0.025  | 5.78 ± 0.33     | <b>82.5 ± 0.64</b>  |                    | 7.95 ± 0.32    |
| <i>PcLAS1</i>                 | <i>PcmISO1</i> |                    | 1.55 ± 0.50          | 10.5 ± 4.2          | 1.92 ± 0.064  | 5.08 ± 0.12     | <b>72.8 ± 4.4</b>   |                    | 7.01 ± 0.24    |
| <i>PcLAS1</i>                 | <i>PcmPIM1</i> | 3.69 ± 1.4         |                      |                     | 1.97 ± 0.034  | 5.35 ± 0.038    | <b>80.0 ± 1.4</b>   |                    | 7.5 ± 0.096    |

\* LC/MS analysis of reaction products revealed two epimers of 13-hydroxy-8(14)-abietene as major products, consistent with the previously reported activity of *Picea abies* LAS (Keeling et al., 2011).
