# Supplementary material for: Evolution of Conifer Diterpene Synthases: Diterpene Resin Acid Biosynthesis in Lodgepole Pine and Jack Pine Involves Monofunctional and Bifunctional Diterpene Synthases
Source: Oxford University Press journal article supplement (doi:10.1104/pp.112.208546), 2012-12-12
Supplement: plphys_v161_2_600_s1.zip [file plphys_v161_2_600_s1.zip › 208546Table_S3_formatted.pdf]

**Table S3. Gene specific primers used for [A] 5'RACE or [B] to amplify full-length genes from lodgepole pine and jack pine cDNA.** For In Fusion cloning into pET28b(+), the start codon ATG was removed, the sequence (5' AAATGGGTCGGGATCCG 3') was added to the 5' end of all forward primers and the sequence (5'CCGCAAGCTTGTCGAC 3') was added at the 5' end of all reverse primers. For truncated constructs, the putative signal peptide was removed prior to the Kx<sub>8</sub>W motif as per Williams et al., 1998.

**[A] Primers used in 5'RACE**

| Species                                       | Gene             | 5'RACE primers (5'-3')       |
|-----------------------------------------------|------------------|------------------------------|
| <b>Jack pine<br/>(<i>Pinus banksiana</i>)</b> | <i>PbLAS1</i>    | ACGAGACGCCCTGTCAAGCCCATGA    |
|                                               |                  | CCTCCAGCCTTGGCATACTTCTATGCC  |
|                                               | <i>PbmPIM1</i>   | CGAGAGTTGGCAGTGCTGATGATATGGC |
|                                               | <i>PbmdiTPS1</i> | GGTCGTCTAAAATGACCAGACAGAC    |

**[B] Primers used to amplify full-length and truncated candidate diterpene synthases from jack and lodgepole pine**

|                    | Species                                           | Gene                  | Forward primer (5'-3')          | Reverse primer (5'-3')          |
|--------------------|---------------------------------------------------|-----------------------|---------------------------------|---------------------------------|
| <b>Full length</b> | <b>Lodgepole pine<br/>(<i>Pinus contorta</i>)</b> | <i>PcLAS1/2</i>       | ATGGCCTTGCCCTTCTTCATTGTC        | CTAAGCAACCGGCTGGAAG             |
|                    |                                                   | <i>PcmPIM1</i>        | ATGGCCATGCCTTTGTGTTTCATTGACATCC | CTACGCAACTGGTTCGAACAGGATCTTTTGG |
|                    |                                                   | <i>PcmISO1</i>        | ATGGCCATGCCTTCGTA CTCTCTTTG     | CTAAGGGACTGGTTCGAATAGGAT        |
|                    |                                                   | <i>Pcm diTPS1/2/3</i> | ATGGCCATGCCCTCCTCTTTAC          | CTAGGCAACCGGTTTGAAG             |
|                    | <b>Jack pine (<i>Pinus banksiana</i>)</b>         | <i>PbLAS1</i>         | ATGGCCTTGCCCTTCTTCATTGTC        | CTAAGCAACCGGCTGGAAG             |
|                    |                                                   | <i>PbmPIM1</i>        | ATGGCCATGCCTTTGTGTTTCATTGACATCC | CTACGCAACTGGTTCGAACAGGATCTTTTGG |
|                    |                                                   | <i>PbmISO1</i>        | ATGGCCATGCCTTCGTA CTCTCTTTG     | CTAAGGGACTGGTTCGAATAGGAT        |
|                    |                                                   | <i>PbmdiTPS1</i>      | ATGGCCATGCCCTCCTCTTTAC          | CTAGGCAACCGGTTTGAAG             |
| <b>Truncated</b>   | <b>Lodgepole pine<br/>(<i>Pinus contorta</i>)</b> | <i>PcLAS1/2</i>       | AAACGAGAATTTCTCCAGG             | CTAAGCAACCGGCTGGAAG             |
|                    |                                                   | <i>PcmPIM1</i>        | AAACGAGAAGAAATCCCCC             | CTACGCAACTGGTTCGAACAGGATCTTTTGG |
|                    |                                                   | <i>PcmISO1</i>        | AAACGAGACTTCCCTCCA              | CTAAGGGACTGGTTCGAA              |
|                    |                                                   | <i>Pcm diTPS1/2/3</i> | AAACGAGAATTTCTCCAGG             | CTAGGCAACCGGTTTGAAG             |
|                    | <b>Jack pine (<i>Pinus banksiana</i>)</b>         | <i>PbLAS1</i>         | AAACGAGAATTTCTCCAGG             | CTAAGCAACCGGCTGGAAG             |
|                    |                                                   | <i>PbmPIM1</i>        | AAACGAGAAGAAATCCCCC             | CTACGCAACTGGTTCGAACAGGATCTTTTGG |
|                    |                                                   | <i>PbmISO1</i>        | AAACGAGACTTCCCTCCA              | CTAAGGGACTGGTTCGAA              |
|                    |                                                   | <i>PbmdiTPS1</i>      | AAACGAGAATTTCTCCAGG             | CTAGGCAACCGGTTTGAAG             |
